# Supplementary material for: Responses of the Macroalga Ulva prolifera Müller to Ocean Acidification Revealed by Complementary NMR- and MS-Based Omics Approaches
Source: MDPI journal article supplement (doi:10.3390/md20120743), 2022-11-26
Supplement: s1 [file s1]

## SUPPLEMENTARY MATERIAL

# Responses of the macroalga *Ulva prolifera* Müller to ocean acidification revealed by complementary NMR- and MS-based omics approaches

Carlos Sanchez-Arcos <sup>1,†</sup>, Debora Paris <sup>2,†</sup>, Valerio Mazzella <sup>3</sup>, Mirko Mutalipassi <sup>4</sup>, Maria Costantini <sup>5</sup>, Maria Cristina Buia <sup>6</sup>, Eric von Elert <sup>1</sup>, Adele Cutignano <sup>2,5,\*</sup>, Valerio Zupo <sup>6,\*</sup>

1 Institute for Zoology, Cologne Biocenter University of Cologne, 50674 Köln, Germany

2 Consiglio Nazionale delle Ricerche (CNR), Istituto di Chimica Biomolecolare (ICB), 80078 Pozzuoli (NA), Italy

3 Stazione Zoologica Anton Dohrn, Department of Marine Integrated Ecology, Ischia Marine Center, 80077 Ischia (NA), Italy

4 Stazione Zoologica Anton Dohrn, Department of Integrative Marine Ecology, Stazione Zoologica Anton Dohrn, Calabria Marine Centre, 87071 Amendolara (CS), Italy

5 Stazione Zoologica Anton Dohrn, Department of Ecosustainable Marine Biotechnology, 80121 Napoli, Italy

6 Stazione Zoologica Anton Dohrn, Department of Ecosustainable Marine Biotechnology, 80077 Ischia (NA), Italy.

† These authors equally contributed.

\* Correspondence: acutignano@icb.cnr.it; Tel.: +39 0818675313 (AC) ; vzupo@szn.it; Tel: +39 081 5833503 (VZ)

**Table S1.** Parameters of the logistic growth evaluated for *Ulva prolifera* cultivated at two pH regimes.

**Table S2.** *Ulva prolifera* enrichment analysis.

**Figure S1.** MS<sup>2</sup> spectra of *m/z* 452.8875, [M+Cl]<sup>-</sup> adduct of compound 145.

**Figure S2.** MS<sup>2</sup> spectra of *m/z* 695.3517, [M-2H+Na]<sup>-</sup> adduct of compound 9.

**Figure S3.** MS<sup>2</sup> spectra of *m/z* 475.3714, [M+Cl]<sup>-</sup> adduct of compound 66.

**Figure S4.** MS<sup>2</sup> spectra of *m/z* 617.3595 (unknown compound 103).

**Figure S5.** MS<sup>2</sup> spectra of *m/z* 528.3198, [M-H]<sup>-</sup> ion of compound 151

**Figure S6.** Lipid yield after *Ulva prolifera* extraction by MTBE/MeOH. Values are reported as a percentage (%) of dry weight ± SD of four replicates in the two growth conditions.

**Figure S7.** Class profile lipidome of *Ulva prolifera* grown in normal (pH 8.1, replicates c, s1-s3) vs acidic (pH 7.7, replicates s4-s7) conditions. The data shown were not normalized.

**Figure S8.** Phosphatidylcholine (PC) composition and semi-quantitation in *Ulva prolifera* grown at pH 8.1 and pH 7.7. Values are reported as ng/mg DW ± SD (n= 4).

**Figure S9.** Phosphatidylglycerol (PG) composition and semi-quantitation in *Ulva prolifera* grown at pH 8.1 and pH 7.7. Values are reported as ng/mg DW ± SD (n= 4).

**Figure S10.** Phosphatidylethanolamine (PE) composition and semi-quantitation in *Ulva prolifera* grown at pH 8.1 and pH 7.7. Values are reported as ng/mg DW ± SD (n= 4).

**Figure S11.** Monogalactosyldiacylglycerol (MGDG) composition and semi-quantitation in *Ulva prolifera* grown at pH 8.1 and pH 7.7. Values are reported as ng/mg DW ± SD (n= 4).

**Figure S12.** Digalactosyldiacylglycerol (DGDG) composition and semi-quantitation in *Ulva prolifera* grown at pH 8.1 and pH 7.7. Values are reported as ng/mg DW ± SD (n= 4).

**Figure S13.** Sulfoquinovosyldiacylglycerol (SQDG) composition and semi-quantitation in *Ulva prolifera* grown at pH 8.1 and pH 7.7. Values are reported as ng/mg DW ± SD (n= 4).

**Figure S14.** Phosphatidylinositol (PI) composition and semi-quantitation in *Ulva prolifera* grown at pH 8.1 and pH 7.7. Values are reported as ng/mg DW  $\pm$  SD (n= 4).

**Methods S1.** Growth curves' logistic equation.

**Methods S2.** NMR spectra acquisition and parameters.

**Table S1.** Parameters of the logistic growth evaluated for *Ulva prolifera* cultivated at two pH regimes.

|                             | Control 8.1      | Acidified 7.7     |
|-----------------------------|------------------|-------------------|
| Logistic growth             |                  |                   |
| Best-fit values             |                  |                   |
| $Y_M$                       | 32,10            | 61,37             |
| $Y_0$                       | 3,736            | 5,472             |
| k                           | 0,2326           | 0,08518           |
| $X_{int}$                   | 4,300            | 11,74             |
| 95% CI (profile likelihood) |                  |                   |
| $Y_M$                       | 29,59 to 34,84   | 52,44 to 83,04    |
| $Y_0$                       | 0,8157 to 7,702  | 2,519 to 9,371    |
| k                           | 0,1370 to 0,4713 | 0,05619 to 0,1214 |
| $X_{int}$                   | 2,122 to 7,299   | 8,238 to 17,80    |
| Goodness of Fit             |                  |                   |
| Degrees of Freedom          | 49               | 46                |
| R squared                   | 0,7090           | 0,8278            |
| Sum of Squares              | 2210             | 3130              |
| Sy.x                        | 6,716            | 8,249             |
|                             |                  |                   |
| Number of points            |                  |                   |
| # of X values               | 52               | 52                |
| # Y values analyzed         | 52               | 49                |

**Table S2.** *Ulva prolifera* enrichment analysis.

| KEGG id    | Entry type | KEGG name                                        | p score    |
|------------|------------|--------------------------------------------------|------------|
| cre00220   | pathway    | Arginine biosynthesis - Chlamydomonas reinhar... | 1,1984E-02 |
| cre00250   | pathway    | Alanine, aspartate and glutamate metabolism -... | 1,0000E-06 |
| cre00330   | pathway    | Arginine and proline metabolism - Chlamydomon... | 1,0000E-06 |
| cre00500   | pathway    | Starch and sucrose metabolism - Chlamydomonas... | 1,5328E-03 |
| cre00670   | pathway    | One carbon pool by folate - Chlamydomonas rei... | 3,9828E-02 |
| cre00920   | pathway    | Sulfur metabolism - Chlamydomonas reinhardtii    | 1,0000E-06 |
| cre02010   | pathway    | ABC transporters - Chlamydomonas reinhardtii     | 3,6294E-02 |
| M00029     | module     | Urea cycle                                       | 7,1211E-04 |
| M00133     | module     | Polyamine biosynthesis, arginine => agmatine ... | 7,0291E-03 |
| M00134     | module     | Polyamine biosynthesis, arginine => ornithine... | 1,0000E-06 |
| M00555     | module     | Betaine biosynthesis, choline => betaine         | 1,0000E-06 |
| M00596     | module     | Dissimilatory sulfate reduction, sulfate => H... | 3,1037E-02 |
| M00616     | module     | Sulfate-sulfur assimilation                      | 3,9000E-06 |
| M00844     | module     | Arginine biosynthesis, ornithine => arginine     | 1,1328E-02 |
| M00855     | module     | Glycogen degradation, glycogen => glucose-6P     | 3,0181E-02 |
| 1.13.11.53 | enzyme     | acireductone dioxygenase (Ni2+-requiring)        | 1,3711E-02 |
| 1.14.11.2  | enzyme     | procollagen-proline 4-dioxygenase                | 1,8466E-02 |
| 1.2.1.8    | enzyme     | betaine-aldehyde dehydrogenase                   | 7,0627E-03 |
| 1.4.1.14   | enzyme     | glutamate synthase (NADH)                        | 1,0000E-06 |
| 1.4.1.3    | enzyme     | glutamate dehydrogenase [NAD(P)+]                | 2,1161E-02 |
| 1.4.7.1    | enzyme     | glutamate synthase (ferredoxin)                  | 1,0000E-06 |
| 1.5.1.54   | enzyme     | methylenetetrahydrofolate reductase (NADH)       | 4,7939E-03 |
| 1.8.3.1    | enzyme     | sulfite oxidase                                  | 3,1849E-03 |
| 1.8.3.4    | enzyme     | methanethiol oxidase                             | 7,0033E-03 |
| 1.8.4.9    | enzyme     | adenylyl-sulfate reductase (glutathione)         | 4,5403E-02 |
| 2.1.3.3    | enzyme     | ornithine carbamoyltransferase                   | 2,4967E-02 |
| 2.4.1.82   | enzyme     | galactinol---sucrose galactosyltransferase       | 1,0000E-06 |
| 2.6.1.13   | enzyme     | ornithine aminotransferase                       | 1,7316E-02 |
| 2.6.1.16   | enzyme     | glutamine---fructose-6-phosphate transaminase... | 1,1000E-06 |
| 2.6.1.2    | enzyme     | alanine transaminase                             | 3,2324E-03 |
| 2.6.1.4    | enzyme     | glycine transaminase                             | 7,3257E-03 |
| 2.6.1.85   | enzyme     | aminodeoxychorismate synthase                    | 5,9257E-03 |
| 2.7.1.78   | enzyme     | polynucleotide 5'-hydroxyl-kinase                | 2,5742E-02 |
| 2.7.7.5    | enzyme     | sulfate adenylyltransferase (ADP)                | 1,2805E-02 |
| 3.1.4.46   | enzyme     | glycerophosphodiester phosphodiesterase          | 2,3061E-02 |
| 3.2.1.20   | enzyme     | alpha-glucosidase                                | 1,9378E-02 |
| 3.2.1.26   | enzyme     | beta-fructofuranosidase                          | 1,6198E-02 |
| 3.5.1.4    | enzyme     | amidase                                          | 9,0800E-05 |

|          |          |                                                  |            |
|----------|----------|--------------------------------------------------|------------|
| 4.1.1.17 | enzyme   | ornithine decarboxylase                          | 2,1461E-02 |
| 4.1.3.27 | enzyme   | anthranilate synthase                            | 2,0641E-02 |
| 4.3.2.1  | enzyme   | argininosuccinate lyase                          | 1,1012E-02 |
| 4.3.3.6  | enzyme   | pyridoxal 5'-phosphate synthase (glutamine hy... | 3,2420E+09 |
| 6.1.1.22 | enzyme   | asparagine---tRNA ligase                         | 1,0000E-06 |
| 6.3.1.2  | enzyme   | glutamine synthetase                             | 1,0000E-06 |
| 6.3.4.2  | enzyme   | CTP synthase (glutamine hydrolyzing)             | 1,0000E-06 |
| 6.3.4.3  | enzyme   | formate---tetrahydrofolate ligase                | 3,9159E-02 |
| 6.3.5.2  | enzyme   | GMP synthase (glutamine-hydrolyzing)             | 1,2033E+09 |
| 6.3.5.4  | enzyme   | asparagine synthase (glutamine-hydrolyzing)      | 1,0000E-06 |
| 6.3.5.5  | enzyme   | carbamoyl-phosphate synthase (glutamine-hydro... | 6,7422E+09 |
| 6.3.5.6  | enzyme   | asparaginyl-tRNA synthase (glutamine-hydrolys... | 1,3147E-02 |
| 6.3.5.7  | enzyme   | glutaminyt-tRNA synthase (glutamine-hydrolysi... | 4,0661E-02 |
| 7.3.2.3  | enzyme   | ABC-type sulfate transporter                     | 3,9009E+08 |
| 7.6.2.2  | enzyme   | ABC-type xenobiotic transporter                  | 3,6294E-02 |
| 7.6.2.3  | enzyme   | ABC-type glutathione-S-conjugate transporter     | 3,6294E-02 |
| R00021   | reaction | L-glutamate:ferredoxin oxidoreductase (transa... | 1,0000E-06 |
| R00093   | reaction | L-glutamate:NAD+ oxidoreductase (transaminati... | 1,0000E-06 |
| R00114   | reaction | L-glutamate:NADP+ oxidoreductase (transaminat... | 1,0000E-06 |
| R00243   | reaction | L-glutamate:NAD+ oxidoreductase (deaminating)    | 1,6323E-04 |
| R00248   | reaction | L-glutamate:NADP+ oxidoreductase (deaminating... | 1,6077E-03 |
| R00253   | reaction | L-Glutamate:ammonia ligase (ADP-forming)         | 1,0000E-06 |
| R00256   | reaction | L-glutamine amidohydrolase                       | 1,0000E-06 |
| R00257   | reaction | Deamido-NAD+:L-glutamine amido-ligase (AMP-fo... | 2,6524E-04 |
| R00258   | reaction | L-Alanine:2-oxoglutarate aminotransferase        | 1,1628E-04 |
| R00260   | reaction | glutamate racemase                               | 4,9521E-02 |
| R00261   | reaction | L-glutamate 1-carboxy-lyase (4-aminobutanoate... | 8,0998E-03 |
| R00355   | reaction | L-Aspartate:2-oxoglutarate aminotransferase      | 2,1359E+09 |
| R00372   | reaction | Glycine:2-oxoglutarate aminotransferase          | 5,4315E-03 |
| R00397   | reaction | L-aspartate 4-carboxy-lyase (L-alanine-formin... | 2,5239E-02 |
| R00400   | reaction | L-alanine:oxaloacetate aminotransferase          | 4,8741E-02 |
| R00483   | reaction | L-aspartate:ammonia ligase (AMP-forming)         | 1,0000E-06 |
| R00485   | reaction | L-asparagine amidohydrolase                      | 1,0000E-06 |
| R00551   | reaction | L-Arginine amidinohydrolase                      | 1,0000E-06 |
| R00552   | reaction | L-Arginine iminohydrolase                        | 1,0000E-06 |
| R00557   | reaction | L-arginine,NADPH:oxygen oxidoreductase (nitri... | 1,5222E+08 |
| R00558   | reaction | L-arginine,NADPH:oxygen oxidoreductase (N-(om... | 1,0000E-06 |
| R00559   | reaction | L-Arginine:oxygen 2-oxidoreductase (decarboxy... | 2,6864E-02 |
| R00562   | reaction | N2-(D-1-carboxyethyl)-L-arginine:NAD+ oxidore... | 9,8816E-03 |
| R00563   | reaction | N2-(D-1,3-dicarboxypropyl)-L-arginine:NADP+ o... | 9,1854E-03 |

|        |          |                                                                           |            |
|--------|----------|---------------------------------------------------------------------------|------------|
| R00565 | reaction | L-Arginine:glycine amidinotransferase                                     | 1,0821E-03 |
| R00566 | reaction | L-arginine carboxy-lyase (agmatine-forming)                               | 1,0633E-04 |
| R00567 | reaction | arginine racemase                                                         | 8,6876E+08 |
| R00571 | reaction | UTP:ammonia ligase (ADP-forming)                                          | 4,1311E-02 |
| R00573 | reaction | UTP:L-glutamine amido-ligase (ADP-forming)                                | 1,0000E-06 |
| R00575 | reaction | HCO <sub>3</sub> <sup>-</sup> :L-glutamine amido-ligase (ADP-forming, ... | 1,0000E-06 |
| R00576 | reaction | L-Glutamine:pyruvate aminotransferase                                     | 6,1348E+08 |
| R00578 | reaction | L-aspartate:L-glutamine amido-ligase (AMP-for...                          | 1,0000E-06 |
| R00579 | reaction | glutamine racemase                                                        | 4,6745E-02 |
| R00760 | reaction | ATP:D-fructose 6-phosphotransferase                                       | 7,7749E-03 |
| R00768 | reaction | L-glutamine:D-fructose-6-phosphate isomerase ...                          | 1,0000E-06 |
| R00801 | reaction | sucrose glucohydrolase                                                    | 1,0000E-06 |
| R00803 | reaction | sucrose:phosphate alpha-D-glucosyltransferase                             | 1,0000E-06 |
| R00805 | reaction | sucrose-6F-phosphate phosphohydrolase                                     | 1,0997E+08 |
| R00806 | reaction | UDP-glucose:D-fructose 2-alpha-D-glucosyltran...                          | 1,0000E-06 |
| R00807 | reaction | Sucrose:(acceptor) 3-oxidoreductase                                       | 4,7645E-03 |
| R00811 | reaction | protein-Npi-phospho-L-histidine:sugar phospho...                          | 7,1836E+08 |
| R00832 | reaction | succinyl-CoA:L-arginine N2-succinyltransferas...                          | 2,8095E-02 |
| R00867 | reaction | ATP:D-fructose 6-phosphotransferase                                       | 1,0664E-02 |
| R00878 | reaction | alpha-D-Glucose aldose-ketose-isomerase                                   | 3,6682E-02 |
| R00908 | reaction | beta-alanine:2-oxoglutarate aminotransferase                              | 4,7904E-02 |
| R00912 | reaction | L-arginine:beta-alanine ligase (ADP-forming)                              | 2,9820E-02 |
| R00943 | reaction | Formate:tetrahydrofolate ligase (ADP-forming)                             | 3,9511E-02 |
| R00945 | reaction | 5,10-Methylenetetrahydrofolate:glycine hydrox...                          | 3,0056E-02 |
| R00946 | reaction | 5-methyltetrahydrofolate:L-homocysteine S-met...                          | 1,3378E-03 |
| R00986 | reaction | Chorismate pyruvate-lyase (amino-accepting)                               | 1,0000E-06 |
| R01021 | reaction | ATP:choline phosphotransferase                                            | 1,0000E-06 |
| R01022 | reaction | choline:oxygen 1-oxidoreductase                                           | 1,0000E-06 |
| R01023 | reaction | Acetyl-CoA:choline O-acetyltransferase                                    | 3,0328E-04 |
| R01025 | reaction | choline:acceptor 1-oxidoreductase                                         | 1,0000E-06 |
| R01026 | reaction | Acetylcholine aetylhydrolase                                              | 2,6975E-04 |
| R01030 | reaction | sn-Glycero-3-phosphocholine glycerophosphohyd...                          | 1,0000E-06 |
| R01072 | reaction | 5-phosphoribosylamine:diphosphate phospho-alp...                          | 2,2550E-03 |
| R01086 | reaction | 2-(Nomega-L-arginino)succinate arginine-lyase...                          | 2,5353E-02 |
| R01103 | reaction | Raffinose galactohydrolase                                                | 1,0000E-06 |
| R01217 | reaction | 5-methyltetrahydrofolate:ferredoxin oxidoredu...                          | 1,4290E-03 |
| R01224 | reaction | 5-methyltetrahydrofolate:NADP+ oxidoreductase                             | 1,4306E-03 |
| R01231 | reaction | Xanthosine-5'-phosphate:L-glutamine amido-lig...                          | 2,5322E+08 |
| R01267 | reaction | L-asparagine hydro-lyase (3-cyanoalanine-form...                          | 1,0000E-06 |
| R01310 | reaction | phosphatidylcholine phosphatidohydrolase                                  | 1,0000E-06 |

|        |          |                                                  |            |
|--------|----------|--------------------------------------------------|------------|
| R01346 | reaction | L-asparagine:2-oxo-acid aminotransferase         | 1,0000E-06 |
| R01566 | reaction | Creatine amidinohydrolase                        | 1,4212E-04 |
| R01648 | reaction | 4-aminobutanoate:2-oxoglutarate aminotransfer... | 3,0039E-02 |
| R01716 | reaction | chorismate:L-glutamine aminotransferase          | 3,2423E-03 |
| R01823 | reaction | Sucrose:1,4-alpha-D-glucan 4-alpha-D-glucosyl... | 1,0000E-06 |
| R01881 | reaction | ATP:creatine N-phosphotransferase                | 1,0000E-06 |
| R01883 | reaction | S-Adenosyl-L-methionine:guanidinoacetate N-me... | 5,5450E-03 |
| R01884 | reaction | Creatinine amidohydrolase                        | 1,0000E-06 |
| R01989 | reaction | L-Arginine:4-aminobutanoate amidinotransferas... | 1,8061E-04 |
| R02120 | reaction | Sucrose:1,6-alpha-D-glucan 6-alpha-D-glucosyl... | 2,8883E+09 |
| R02381 | reaction | Sinapoylcholine sinapohydrolase                  | 6,2208E-04 |
| R02411 | reaction | 1-alpha-D-Galactosyl-myo-inositol:sucrose 6-a... | 1,0000E-06 |
| R02542 | reaction | Sphingomyelin ceramide-phosphohydrolase          | 9,3486E+09 |
| R02573 | reaction | Trimethylsulfonium:tetrahydrofolate N-methylt... | 4,0782E-02 |
| R02574 | reaction | S,S-Dimethyl-beta-propiothetin dimethyl-sulfi... | 1,0000E-06 |
| R02922 | reaction | Creatinine iminohydrolase                        | 1,6178E-03 |
| R03075 | reaction | 1-O-(4-Hydroxy-3,5-dimethoxycinnamoyl)-beta-D... | 1,3057E-03 |
| R03648 | reaction | L-Asparagine:tRNA(Asn) ligase (AMP-forming)      | 1,0000E-06 |
| R04194 | reaction | Sucrose:2,1-beta-D-fructan 1-beta-D-fructosyl... | 3,7803E-03 |
| R04212 | reaction | Asp-tRNA(Asn):L-glutamine amido-ligase (ADP-f... | 1,5690E-02 |
| R04463 | reaction | 5'-Phosphoribosylformylglycinamide:L-glutamin... | 2,8636E-02 |
| R05140 | reaction | sucrose:2,6-beta-D-fructan 6-beta-D-fructosyl... | 1,3069E+09 |
| R05225 | reaction | Adenosyl cobyrinate a,c diamide + 4 L-Glutami... | 1,3251E-02 |
| R05362 | reaction | 2-hydroxy-6-oxoocta-2,4,7-trienoate formylhyd... | 2,7852E-03 |
| R05465 | reaction | D-Glyceraldehyde 3-phosphate + L-Arginine <=>... | 2,8000E-02 |
| R05794 | reaction | CDP-diacylglycerol:choline O-phosphatidyltran... | 1,0000E-06 |
| R06871 | reaction | Phosphocholine phosphohydrolase                  | 1,0000E-06 |
| R07168 | reaction | 5-methyltetrahydrofolate:NAD+ oxidoreductase     | 1,3616E-03 |
| R07363 | reaction | 1,2-dihydroxy-5-(methylthio)pent-1-en-3-one:o... | 4,0434E-03 |
| R07377 | reaction | Phosphatidylcholine + L-Serine <=> Phosphatid... | 1,0000E-06 |
| R07386 | reaction | O-1-Alk-1-enyl-2-acyl-sn-glycero-3-phosphoeth... | 2,5147E+09 |
| R07409 | reaction | choline,reduced-ferredoxin:oxygen oxidoreduct... | 1,0000E-06 |
| R07420 | reaction | Phosphocreatine <=> Creatinine + Orthophospha... | 1,0000E-06 |
| R08197 | reaction | L-arginine:pyruvate aminotransferase             | 1,0000E-06 |
| R08557 | reaction | Choline + NAD+ <=> Betaine aldehyde + NADH + ... | 1,0000E-06 |
| R08558 | reaction | Choline + NADP+ <=> Betaine aldehyde + NADPH ... | 1,0000E-06 |
| R08891 | reaction | L-glutamine:3-amino-2,3-dideoxy-scylo-inosos...  | 4,0254E-02 |
| R08956 | reaction | (2S)-2-amino-4-deoxychorismate:L-glutamate am... | 5,4339E-03 |
| R09501 | reaction | dimethyl sulfide:menaquinone oxidoreductase      | 2,7131E-02 |
| R09786 | reaction | dimethyl sulfide,NADH:oxygen oxidoreductase      | 1,1807E-04 |



|        |          |                                                  |            |
|--------|----------|--------------------------------------------------|------------|
| R10089 | reaction | D-ribose 5-phosphate,D-glyceraldehyde 3-phosp... | 1,0000E-06 |
| R10243 | reaction | Tetrahydrofolate + Acetyl-CoA <=> 5-Methyltet... | 3,3562E-04 |
| R10333 | reaction | S,S-dimethyl-beta-propiothetin:tetrahydrofola... | 1,0000E-06 |
| R10820 | reaction | 3-(methylthio)propanoate:CoA ligase (AMP-form... | 1,3175E-02 |
| R11031 | reaction | L-arginine:NAD+ oxidoreductase (deaminating)     | 1,0000E-06 |
| R11032 | reaction | L-arginine:NADP+ oxidoreductase (deaminating)    | 1,0000E-06 |
| R11033 | reaction | L-Arginine <=> N(omega)-Hydroxyarginine          | 1,0000E-06 |
| R11515 | reaction | malonyl-[acyl-carrier protein]:L-glutamine am... | 3,0405E-02 |
| R11546 | reaction | S-adenosyl-L-methionine:methanethiol S-methyl... | 1,1220E-04 |
| R11604 | reaction | L-arginine:oxygen oxidoreductase (deaminating... | 1,0000E-06 |
| R11711 | reaction | L-arginine,reduced-flavodoxin:oxygen oxidored... | 6,9781E-04 |
| R11712 | reaction | 2 L-Arginine + 2 Reduced flavodoxin + 2 Oxyge... | 3,5719E-04 |
| R12293 | reaction | O-mannose core M3 + ATP <=> Phospho-core M3 +    | 2,4978E-02 |
| R12352 | reaction | N3-Fumaroyl-L-2,3-diaminopropanoate + L-Gluta... | 3,1485E-02 |
| R12507 | reaction | L-glutamine:4-(methylsulfanyl)-2-oxobutanoate... | 2,1967E-04 |
| R12706 | reaction | Nopaline + H2O + Acceptor <=> L-Arginine + 2-... | 8,3497E-03 |
| R12707 | reaction | Octopine + H2O + Acceptor <=> L-Arginine + Py... | 9,2854E-03 |
| R12939 | reaction | chorismate:L-glutamine aminotransferase (2-am... | 3,1199E-03 |
| C00002 | compound | ATP                                              | 1,9493E-02 |
| C00008 | compound | ADP                                              | 1,7463E-02 |
| C00009 | compound | Orthophosphate                                   | 1,1725E-02 |
| C00025 | compound | <b>L-Glutamate</b>                               | 1,0000E-06 |
| C00031 | compound | D-Glucose                                        | 4,7394E-02 |
| C00049 | compound | L-Aspartate                                      | 9,6460E-03 |
| C00062 | compound | <b>L-Arginine</b>                                | 1,0000E-06 |
| C00064 | compound | <b>L-Glutamine</b>                               | 1,0000E-06 |
| C00089 | compound | <b>Sucrose</b>                                   | 1,0000E-06 |
| C00095 | compound | D-Fructose                                       | 1,5823E-03 |
| C00101 | compound | Tetrahydrofolate                                 | 4,9609E-04 |
| C00114 | compound | <b>Choline</b>                                   | 1,0000E-06 |
| C00152 | compound | <b>L-Asparagine</b>                              | 1,0000E-06 |
| C00300 | compound | Creatine                                         | 3,0168E+09 |
| C00440 | compound | 5-Methyltetrahydrofolate                         | 6,2070E+09 |
| C00511 | compound | Acrylic acid                                     | 1,8899E+08 |
| C00580 | compound | Dimethyl sulfide                                 | 1,0000E-06 |
| C00791 | compound | Creatinine                                       | 1,8990E+07 |
| C02305 | compound | <b>Phosphocreatine</b>                           | 1,0000E-06 |
| C04022 | compound | <b>S,S-Dimethyl-beta-propiothetin</b>            | 1,0000E-06 |
| C08276 | compound | 3-(Methylthio)propanoate                         | 1,0431E-04 |

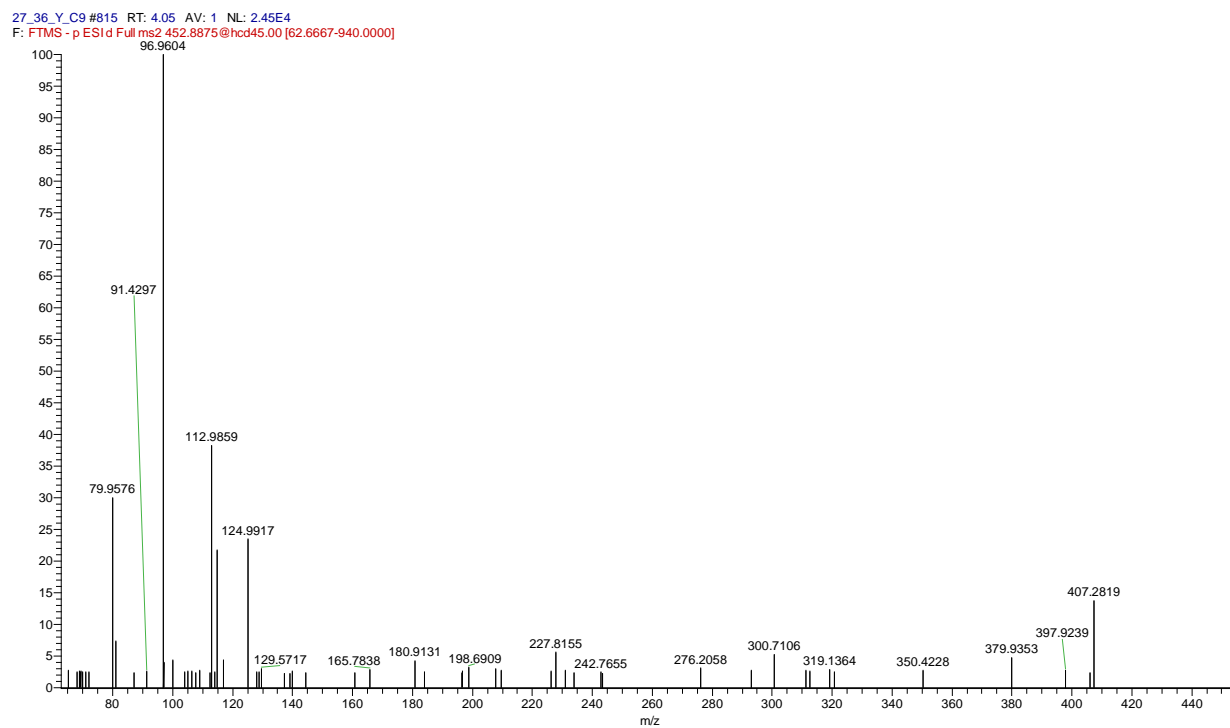

Figure S1. MS<sup>2</sup> spectra of  $m/z$  452.8875,  $[M+Cl]^-$  adduct of compound 145.

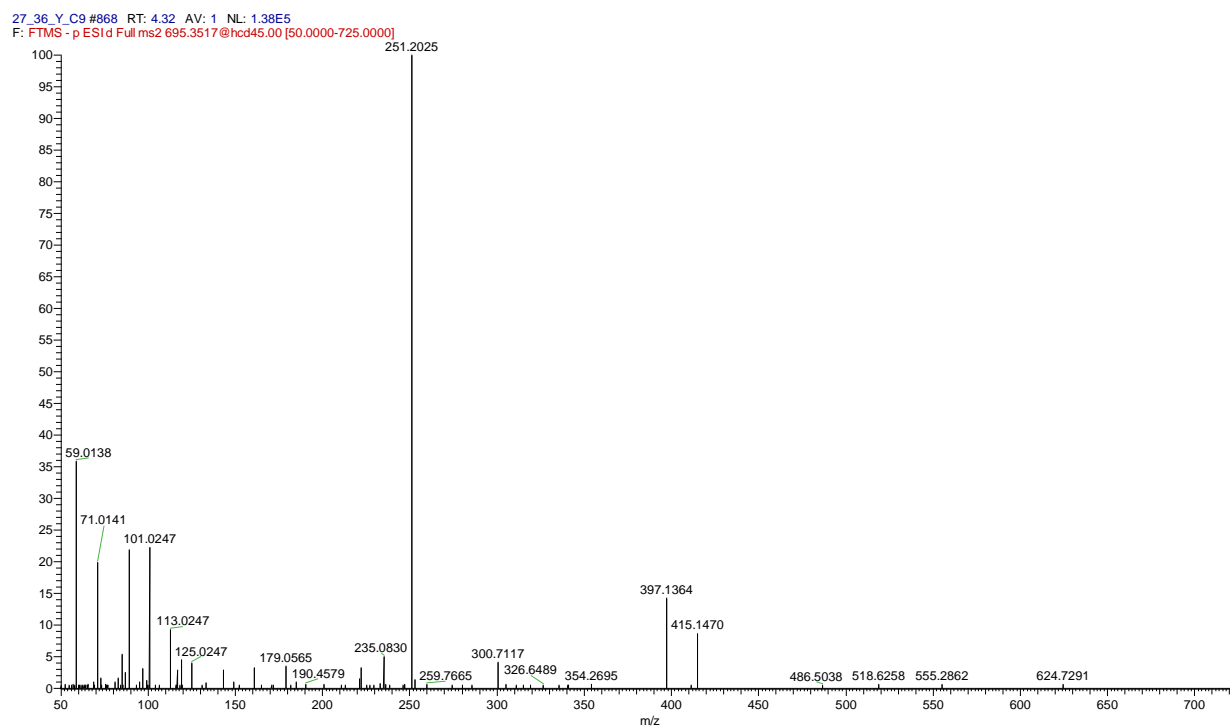

Figure S2. MS<sup>2</sup> spectra of  $m/z$  695.3517,  $[M-2H+Na]^-$  adduct of compound 9.

27\_36\_Y\_C9 #538 RT: 5.13 AV: 1 NL: 6.77E6  
F: FTMS - p ESI Full ms2 475.3714 @hcd 45.00 [75.0000-1125.0000]

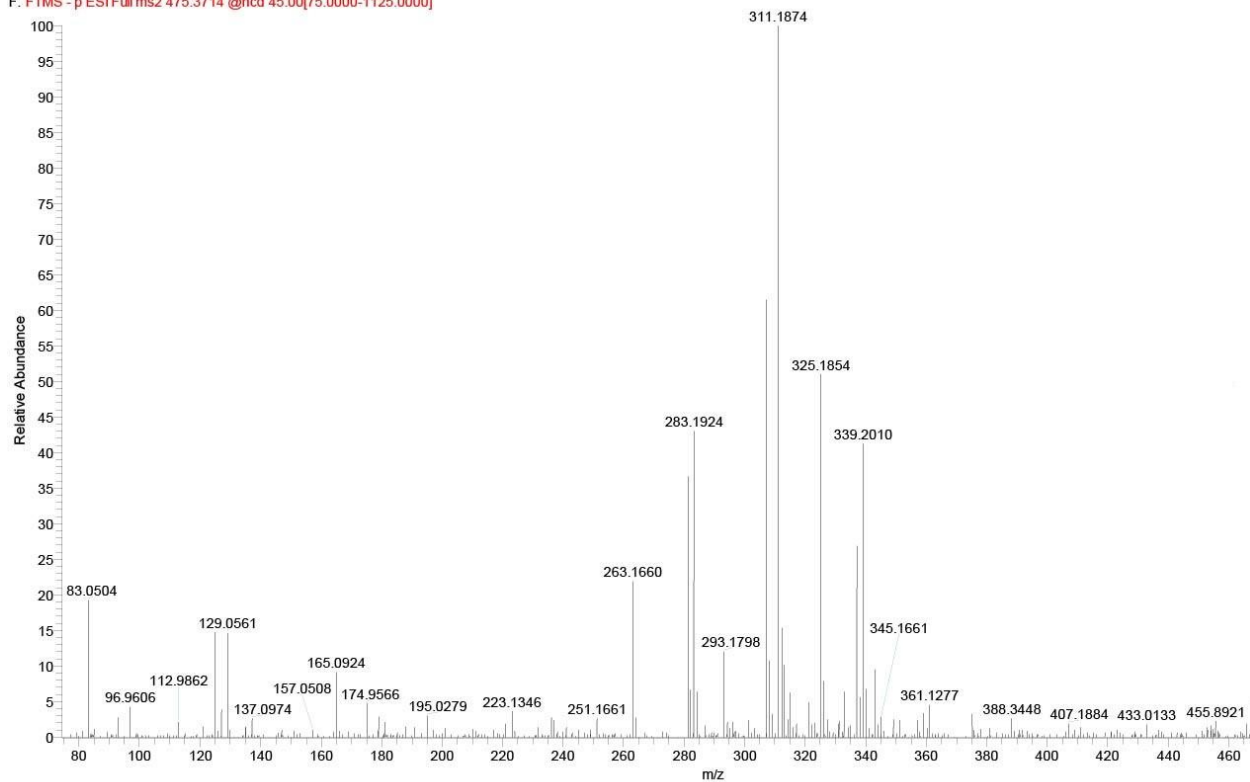

**Figure S3.** MS<sup>2</sup> spectra of *m/z* 475.3714, [M+Cl]<sup>-</sup> adduct of compound 66.

27\_36\_Y\_C9 #907 RT: 4.52 AV: 1 NL: 3.71E4  
F: FTMS - p ESI d Full ms2 617.3593 @hcd 45.00 [50.0000-650.0000]

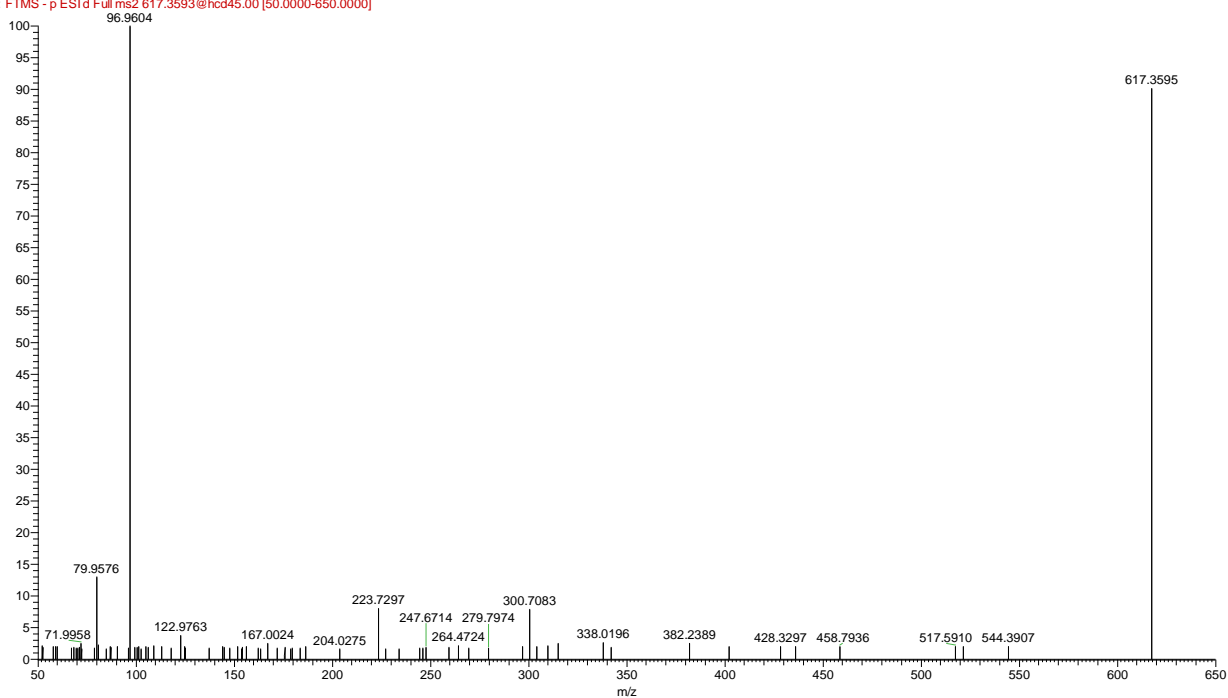

**Figure S4.** MS<sup>2</sup> spectra of *m/z* 617.3595 (unknown compound 103).

27\_36\_Y\_C9 #682 RT: 3.39 AV: 1 NL: 1.58E5  
F: FTMS - p ESI-d Full ms2 528.3198@hcd45.00 [50.0000-555.0000]

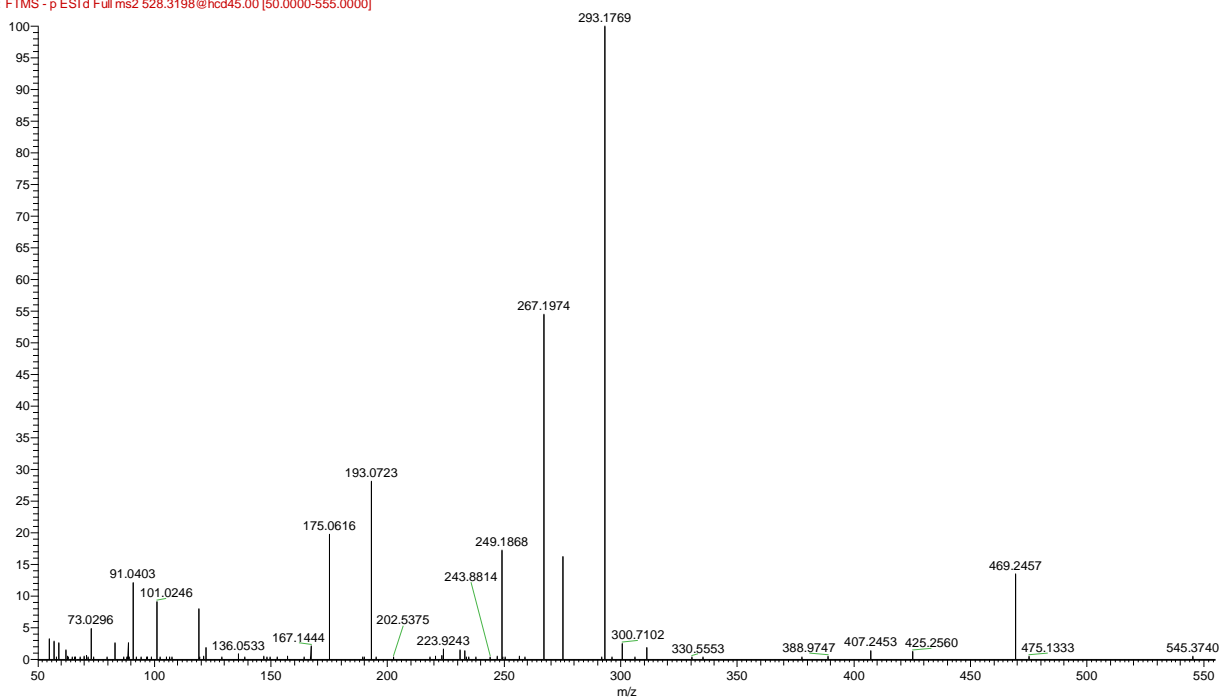

**Figure S5.** MS<sup>2</sup> spectra of  $m/z$  528.3198,  $[M-H]^-$  ion of compound 151

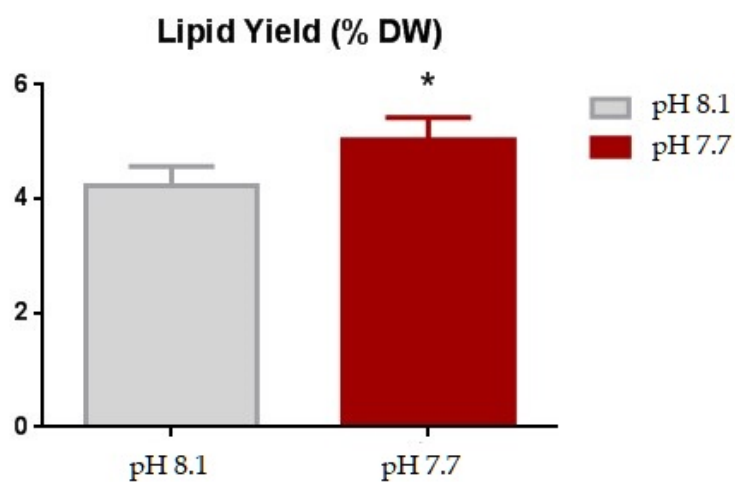

**Figure S6.** Lipid yield after *Ulva prolifera* extraction by MTBE/MeOH. Values are reported as a percentage (%) of dry weight  $\pm$  SD of four replicates in the two growth conditions.

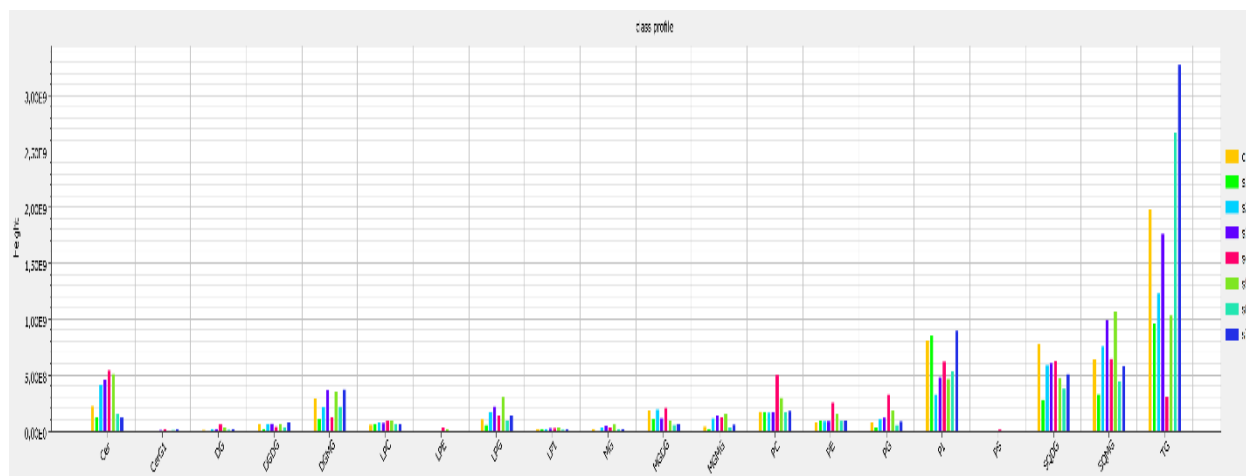

**Figure S7.** Class profile lipidome of *Ulva prolifera* grown in normal (pH 8.1, replicates c, s1-s3) vs acidic (pH 7.7, replicates s4-s7) conditions. The data shown were not normalized.

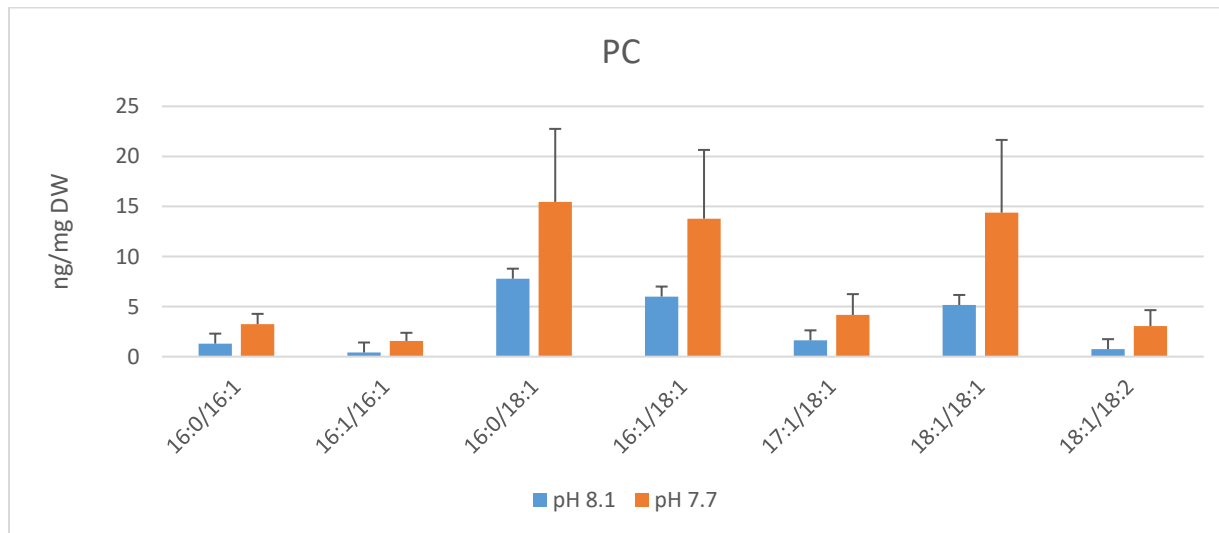

**Figure S8.** Phosphatidylcholine (PC) composition and semi-quantitation in *Ulva prolifera* grown at pH 8.1 and pH 7.7. Values are reported as ng/mg DW  $\pm$  SD (n= 4).

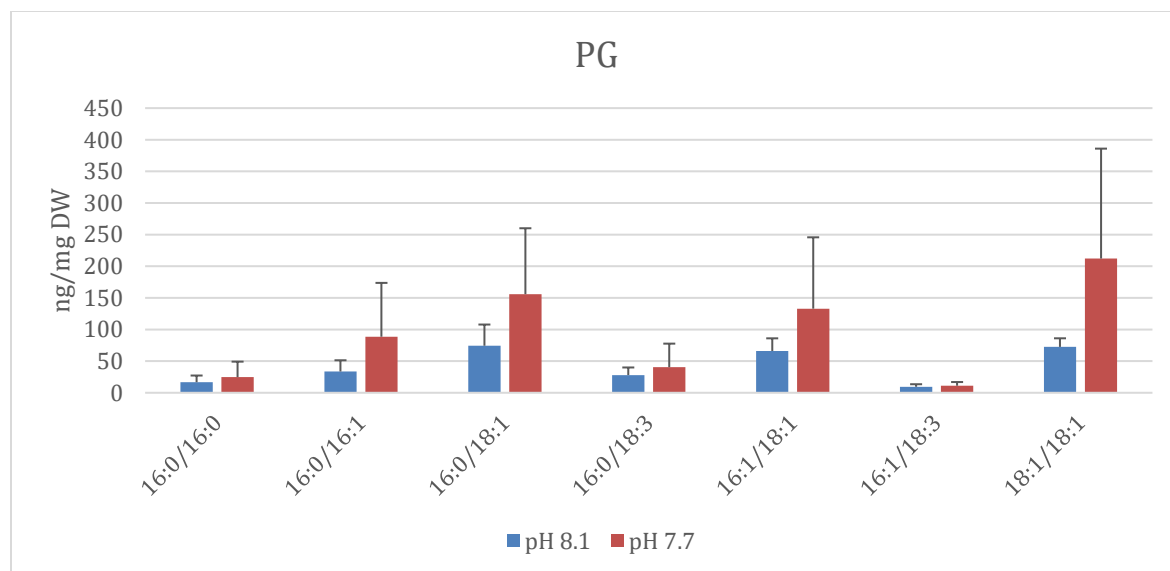

**Figure S9.** Phosphatidylglycerol (PG) composition and semi-quantitation in *Ulva prolifera* grown at pH 8.1 and pH 7.7. Values are reported as ng/mg DW  $\pm$  SD (n= 4).

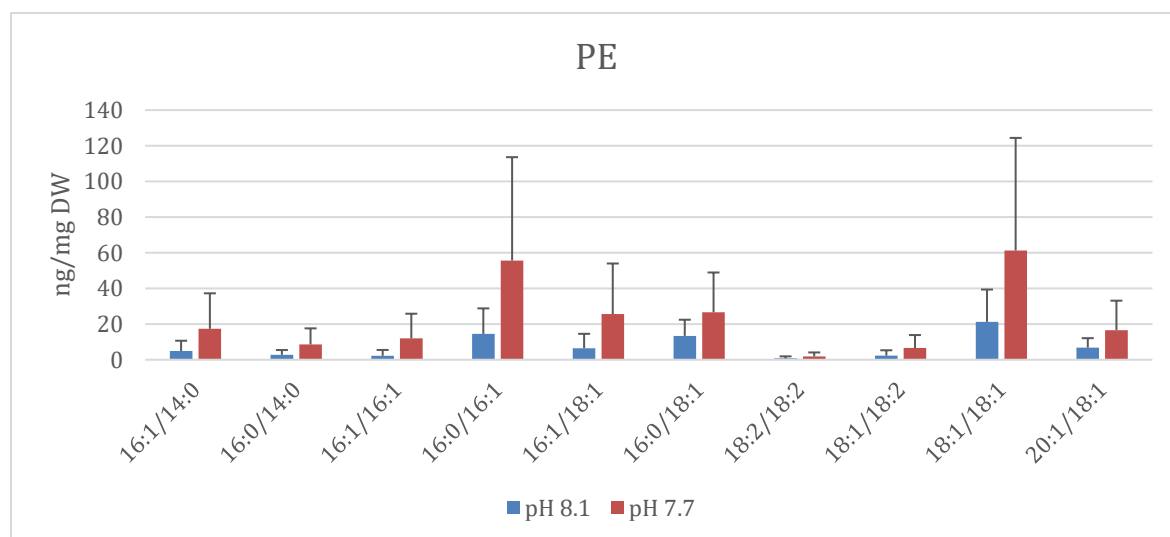

**Figure S10.** Phosphatidylethanolamine (PE) composition and semi-quantitation in *Ulva prolifera* grown at pH 8.1 and pH 7.7. Values are reported as ng/mg DW  $\pm$  SD (n= 4).

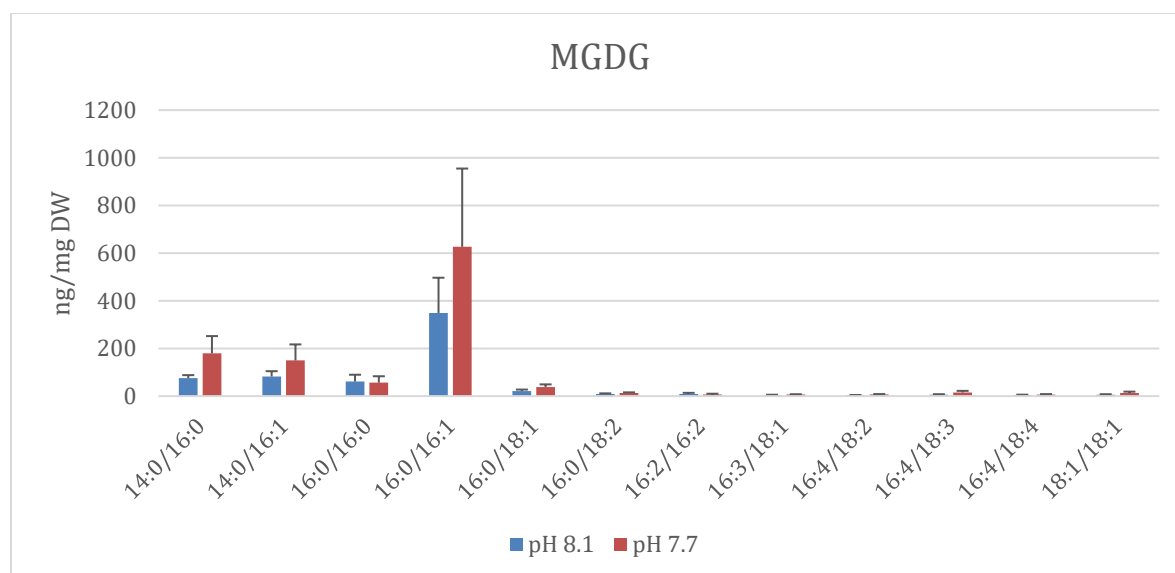

**Figure S11.** Monogalactosyldiacylglycerol (MGDG) composition and semi-quantitation in *Ulva prolifera* grown at pH 8.1 and pH 7.7. Values are reported as ng/mg DW  $\pm$  SD (n= 4).

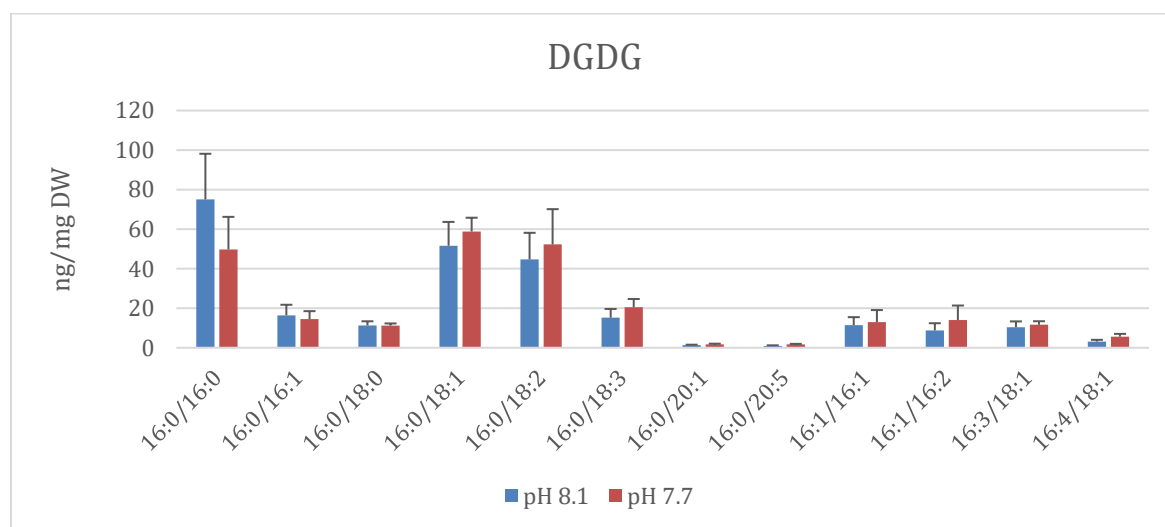

**Figure S12.** Digalactosyldiacylglycerol (DGDG) composition and semi-quantitation in *Ulva prolifera* grown at pH 8.1 and pH 7.7. Values are reported as ng/mg DW  $\pm$  SD (n= 4).

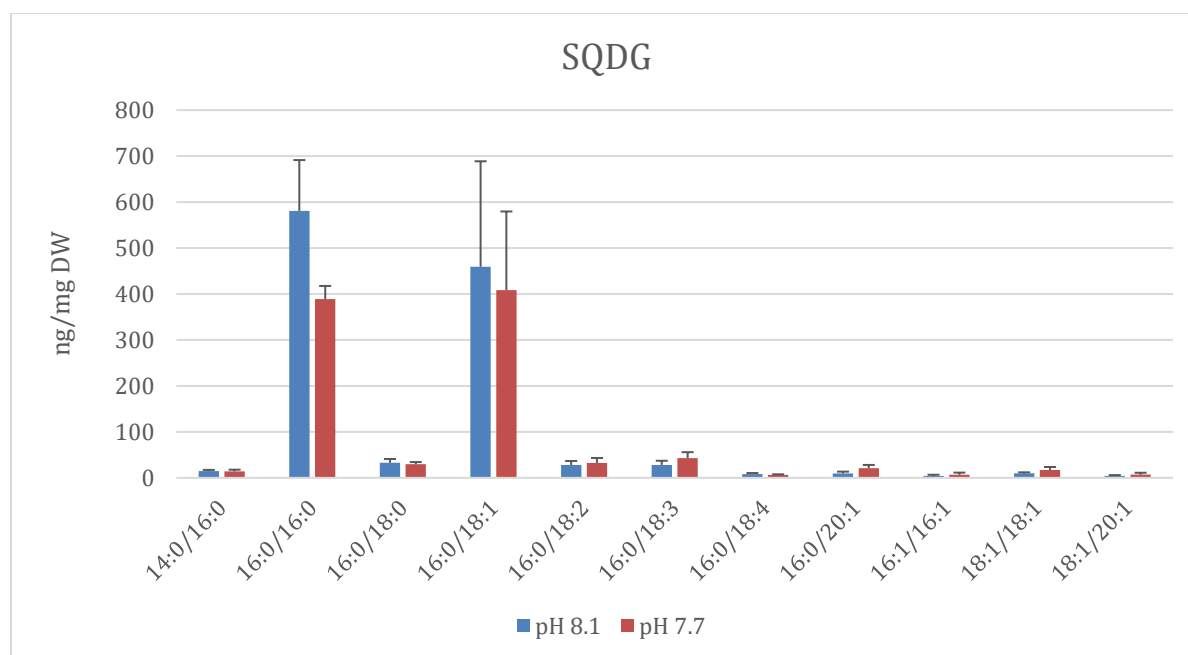

**Figure S13.** Sulfoquinovosyldiacylglycerol (SQDG) composition and semi-quantitation in *Ulva prolifera* grown at pH 8.1 and pH 7.7. Values are reported as ng/mg DW  $\pm$  SD (n= 4).

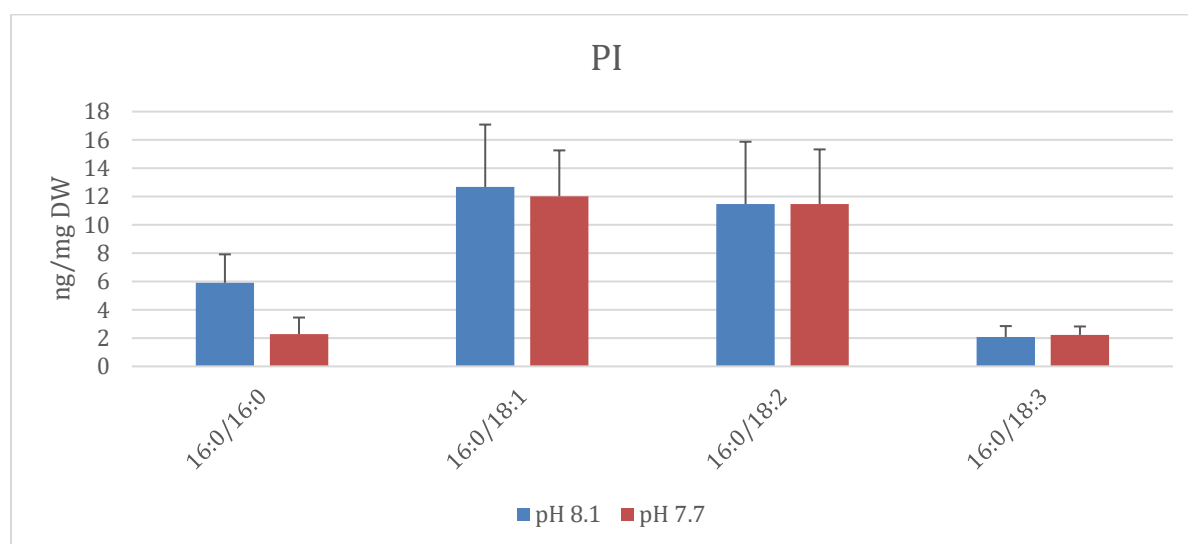

**Figure S14.** Phosphatidylinositol (PI) composition and semi-quantitation in *Ulva prolifera* grown at pH 8.1 and pH 7.7. Values are reported as ng/mg DW  $\pm$  SD (n= 4).



## Supplementary materials and methods.

### ***Methods S1. Growth curves' logistic equation***

Logistic growth curves describe phenomena that start nearly exponential and slow down while reaching the maximum population. The logistic model is defined by a linear decrease of the relative growth rate over time, according to the equation:

$$Y = Y_M * Y_0 / ((Y_M - Y_0) * \exp(-k * x) + Y_0)$$

Where:

$Y_0$  is the starting population (same units as  $Y$ )

$Y_M$  is the maximum population (same units as  $Y$ )

$k$  is the rate constant (inverse units of  $X$ )

$1/k$  is the  $X$  coordinate of the first inflexion point

At any given time, the growth rate is proportional to  $Y(1 - Y/Y_M)$ , where  $Y$  is the current population size, and  $Y_M$  is the maximum possible population size. As  $Y$  approaches the maximum, that second term gets smaller, and the growth slows. The curves obtained for both treatments were compared using a Mann-Whitney test. The differences among slopes of growth curves were evaluated employing confidence intervals using Graphpad Prism (GraphPad Prism version 8.0.0 for Mac, GraphPad Software, San Diego, California USA, [www.graphpad.com](http://www.graphpad.com)).

## ***Methods S2. NMR spectra acquisition and parameters***

One-dimensional (1D) proton spectra were acquired using the excitation sculpting sequence (Hwang and Shaka, 1995). A double-pulsed field gradient echo was used, with a soft square pulse of 4 ms at the water resonance frequency, with the gradient pulse of 1 ms each in duration, adding 516 transients of 16384 points with a spectral width of 8417.5Hz. Time-domain data were all zero-filled to 32768 points, and prior to Fourier transformation, an exponential multiplication of 0.8 Hz was applied. For the two-dimensional (2D) clean total correlation spectroscopy (TOCSY) (Griesinger et al., 1988; Bax and Davis, 1985) spectra, we used a standard pulse sequence with a spinlock period of 64 ms, achieved with the MLEV-17 pulse sequence, and incorporating the excitation sculpting sequence for water suppression. In general, 256 equally spaced evolution-time period  $t_1$  values were acquired, averaging 64 transients of 2048 points, with 8403.36Hz of spectral width. Time-domain data matrices were all zero-filled to 4096 points in both dimensions, thus yielding a digital resolution of 2.04 Hz/pt. Before Fourier transformation, a Lorentz-to-Gauss window with different parameters was applied for all the experiments'  $t_1$  and  $t_2$  dimensions. Spectra in water were referred to as internal 0.1 mM TSP, assumed to resonate at  $\delta = 0.00$  ppm. Natural abundance 2D  $^1\text{H}$ - $^{13}\text{C}$  heteronuclear single quantum coherence (HSQC) spectra were recorded at 150.90 MHz for  $^{13}\text{C}$ , using an echo-anti echo phase-sensitive pulse sequence with adiabatic pulses for decoupling (Palmer III et al., 1991; Kay et al., 1992) and presaturation for water suppression (Schleucher et al., 1994). 256 equally spaced evolution-time period  $t_1$  values were acquired, averaging 96 transients of 2048 points and using GARP4 for decoupling. The final data matrix was zero-filled to 4096 in both dimensions and apodized before Fourier transformation by a shifted cosine window function in  $t_2$  and  $t_1$ . The linear prediction was also applied to extend the data to twice its length in  $t_1$ . HSQC spectra in water were referred to the  $\alpha$ -glucose doublet resonating at 5.24 ppm for  $^1\text{H}$  and 93.10 ppm for  $^{13}\text{C}$ .
